# Supplementary material
Source: Springer Nature journal article supplement (https://www.springermedizin.de/resource/supplementary/12881_2012_1065_MOESM7_ESM.pdf/9451752)
Supplement: MOESM7 [file 9451752]

14,541 pregnant women recruited

- 339 women with more than one pregnancy in ALSPAC
- 69 women with missing data

14,133 women with only one pregnancy in ALSPAC

- 195 women with a multiple pregnancy

13,938 women with singleton pregnancies

- 1,901 non-white women and women missing ethnicity data

12,037 white women

- 340 non-white children, 1 miscarriage

11,696 white women with white children

- 5424 children without IQ score

6272 mother/child pairs with IQ score

- 2501 mothers without genotype data (average)
- 1194 children without genotype data (average)

3771 mothers with genotype data and child with IQ score (average)  
5078 children with genotype data and IQ score (average)
